# Supplementary material for: Intra- and Interexaminer Measurement Variability Analysis of an Orthodontic Gauge Device to Determine Incisor Occlusal Surface Angles in the Horse
Source: MDPI journal article supplement (doi:10.3390/vetsci9090481), 2022-09-07
Supplement: s1 [file s1]

**Table S2.** Exemplary examination protocol for block 1 and observer 1.

| Block | Passage | Observer | Measure | Box | TA ( $\alpha$ ) |   |   | SA ( $\alpha$ ) right | SA ( $\alpha$ ) left |
|-------|---------|----------|---------|-----|-----------------|---|---|-----------------------|----------------------|
|       |         |          |         |     | 0°              | 3 | 4 |                       |                      |
| 1     | 1       | 1        | 1       | 2   |                 |   |   |                       |                      |
|       |         |          | 2       | 6   |                 |   |   |                       |                      |
|       |         |          | 3       | 4   |                 |   |   |                       |                      |
|       |         |          | 4       | 1   |                 |   |   |                       |                      |
|       |         |          | 5       | 3   |                 |   |   |                       |                      |
|       |         |          | 6       | 5   |                 |   |   |                       |                      |
| 1     | 2       | 1        | 1       | 4   |                 |   |   |                       |                      |
|       |         |          | 2       | 6   |                 |   |   |                       |                      |
|       |         |          | 3       | 3   |                 |   |   |                       |                      |
|       |         |          | 4       | 5   |                 |   |   |                       |                      |
|       |         |          | 5       | 2   |                 |   |   |                       |                      |
|       |         |          | 6       | 1   |                 |   |   |                       |                      |
| 1     | 3       | 1        | 1       | 2   |                 |   |   |                       |                      |
|       |         |          | 2       | 3   |                 |   |   |                       |                      |
|       |         |          | 3       | 4   |                 |   |   |                       |                      |
|       |         |          | 4       | 6   |                 |   |   |                       |                      |
|       |         |          | 5       | 1   |                 |   |   |                       |                      |
|       |         |          | 6       | 5   |                 |   |   |                       |                      |
| 1     | 4       | 1        | 1       | 2   |                 |   |   |                       |                      |
|       |         |          | 2       | 5   |                 |   |   |                       |                      |
|       |         |          | 3       | 6   |                 |   |   |                       |                      |
|       |         |          | 4       | 1   |                 |   |   |                       |                      |
|       |         |          | 5       | 3   |                 |   |   |                       |                      |
|       |         |          | 6       | 4   |                 |   |   |                       |                      |

TA, transversal angle (3 = DGL-3, 4 = DGL-4); SA, sagittal angle.
