# Supplementary material for: Intra- and Interexaminer Measurement Variability Analysis of an Orthodontic Gauge Device to Determine Incisor Occlusal Surface Angles in the Horse
Source: MDPI journal article supplement (doi:10.3390/vetsci9090481), 2022-09-07
Supplement: s1 [file s1]

**Table S1.** Block-randomization list.

| Block | Passage |             | Box 1 | Box 2 | Box 3 | Box 4 | Box 5 | Box 6 |
|-------|---------|-------------|-------|-------|-------|-------|-------|-------|
| 1     | 1       | Head number | 1     | 2     | 3     | 4     | 5     | 6     |
|       | 2       |             | 2     | 6     | 4     | 3     | 1     | 5     |
|       | 3       |             | 4     | 6     | 2     | 1     | 5     | 3     |
|       | 4       |             | 1     | 5     | 2     | 4     | 3     | 6     |
| 2     | 1       |             | 6     | 4     | 1     | 2     | 3     | 5     |
|       | 2       |             | 5     | 3     | 1     | 6     | 2     | 4     |
|       | 3       |             | 3     | 1     | 5     | 4     | 6     | 2     |
|       | 4       |             | 4     | 1     | 6     | 5     | 2     | 3     |
| 3     | 1       |             | 6     | 5     | 3     | 4     | 2     | 1     |
|       | 2       |             | 4     | 6     | 1     | 2     | 5     | 3     |
|       | 3       |             | 5     | 3     | 2     | 6     | 1     | 4     |
|       | 4       |             | 3     | 1     | 5     | 4     | 2     | 6     |
| 4     | 1       |             | 2     | 6     | 4     | 3     | 5     | 1     |
|       | 2       |             | 4     | 3     | 6     | 1     | 2     | 5     |
|       | 3       |             | 1     | 2     | 3     | 5     | 4     | 6     |
|       | 4       |             | 6     | 4     | 5     | 2     | 1     | 3     |

Fixed factors: block, passage, and box; random range: head 1–6.
