# Supplementary material for: Intra- and Interexaminer Measurement Variability Analysis of an Orthodontic Gauge Device to Determine Incisor Occlusal Surface Angles in the Horse
Source: MDPI journal article supplement (doi:10.3390/vetsci9090481), 2022-09-07
Supplement: s1 [file s1]

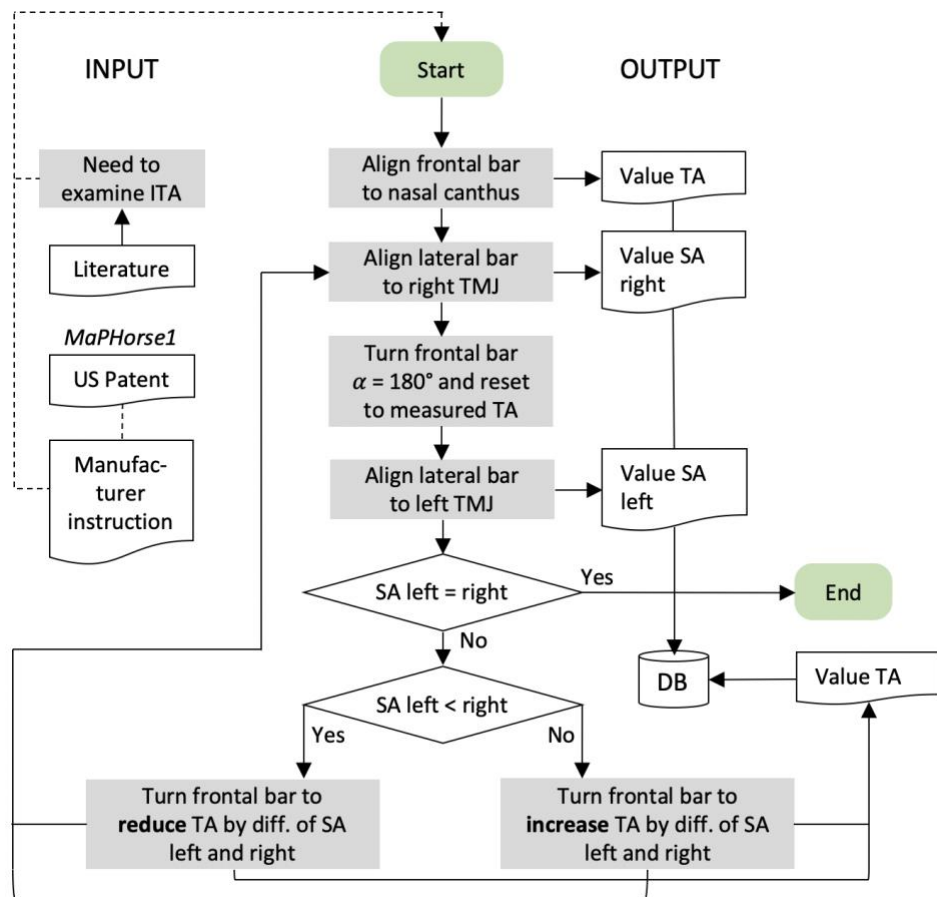

**Figure S2.** Process flow chart of corrective double sided reading for TA measures using TMJ bony landmarks.
