# Supplementary material for: Intra- and Interexaminer Measurement Variability Analysis of an Orthodontic Gauge Device to Determine Incisor Occlusal Surface Angles in the Horse
Source: MDPI journal article supplement (doi:10.3390/vetsci9090481), 2022-09-07
Supplement: s1 [file s1]

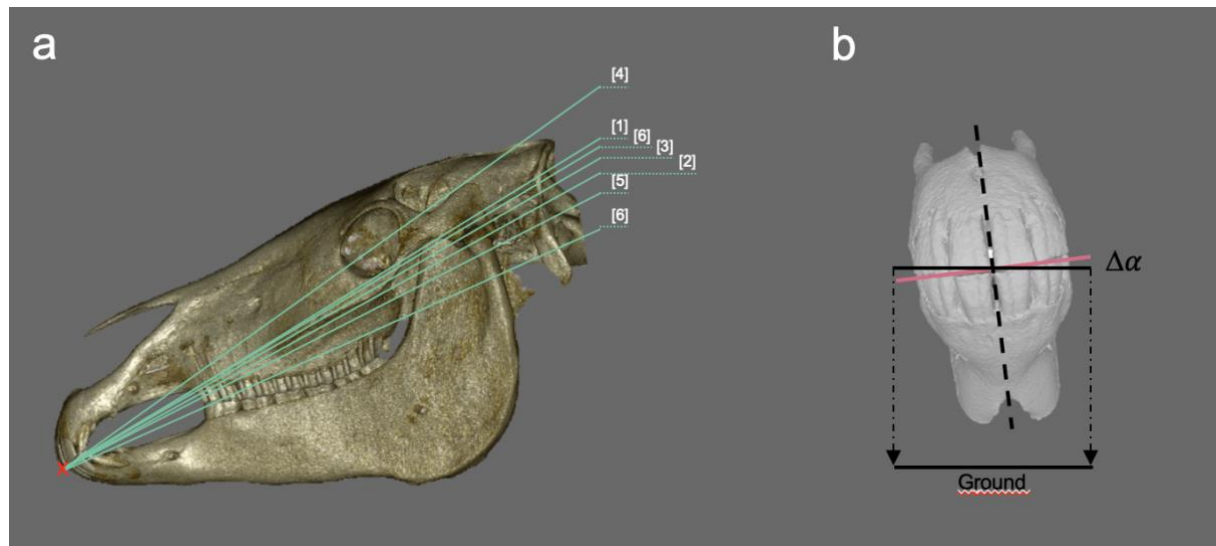

**Figure S1.** Heterogeneity of assumed normocclusion inclination of incisor occlusal surface SA (a) and visualization of the problem interpreting TA using an external reference frame at tilted head position (b).

#### References:

- [1] D. O. Klugh, "Anatomical characteristics of equine dentition," in *Principles of Equine Dentistry*, 1st ed., D. O. Klugh, Ed. London: Manson Publishing, 2010, pp. 27–48.
- [2] D. O. Klugh, "Principles of occlusal equilibration," in *Principles of Equine Dentistry*, 1st ed., D. O. Klugh, Ed. London: Manson Publishing, 2010, pp. 67–78.
- [3] K. Ros, "Biomechanics," in *Textbook of Equine Dentistry*, 1st ed., C. Vogt, Ed. Stuttgart: Schattauer GmbH, 2011, pp. 31–48.
- [4] M. Pellachin, "Objective Measurements of occlusal angles," in *Proceedings of the 11th IGFP Conference*, 2013, pp. 45–57.
- [5] B. A. Rucker, "Incisor and molar occlusion: normal ranges and indications for incisor reduction," in *Proceedings of the 50th Annual Convention of the American Association of Equine Practitioners, Denver, Colorado, USA*, 2004, pp. 7–12.
- [6] T. Allen, "Examination," in *Manual of Equine Dentistry*, 1st ed., T. Allen, Ed. St. Louis: Muleicorn Press, 2008, pp. 67–88.
